# Supplementary material for: A colorimetric multilayer sensor for discriminating red wine and green tea by measurement of antioxidant activity
Source: Royal Society of Chemistry journal article supplement (doi:10.1039/c5ay03360h), 2016-01-01
Supplement: c5ay03360h1.pdf [file c5ay03360h1.pdf]

## Supplyment Materials

Table S1 summary of brand, category and alcoholic strength of the 5 red wines

| <b>Number</b> | <b>Brand</b> | <b>Category</b>    | <b>Alcoholic strength</b> | <b>Year</b> |
|---------------|--------------|--------------------|---------------------------|-------------|
| W1            | Great wall   | Cabernet Sauvignon | 12.5% (v%)                | 2009        |
| W2            | Changyu      | Cabernet Sauvignon | 12.5% (v%)                | 2009        |
| W3            | Moutai       | Cabernet Sauvignon | 12.5% (v%)                | 2009        |
| W4            | Dynasty      | Cabernet Sauvignon | 12.5% (v%)                | 2009        |
| W5            | Shangri-la   | Cabernet Sauvignon | 12.5% (v%)                | 2009        |

Table S2 summary of grades and price of the five green teas

| <b>Number</b> | <b>Grade</b>  | <b>Price (RMB/kg)</b> |
|---------------|---------------|-----------------------|
| T1            | Special grade | 1100.00               |
| T2            | Special grade | 760.00                |
| T3            | First grade   | 560.00                |
| T4            | First grade   | 240.00                |
| T5            | First grade   | 229.00                |

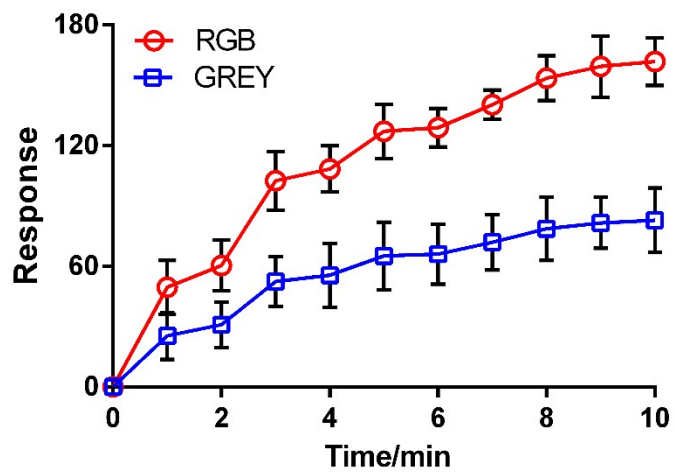

Fig. S1 Influence of reaction time to the response of the multilayer sensors (5 cycles) toward gallic acid (0.1mg/ml)

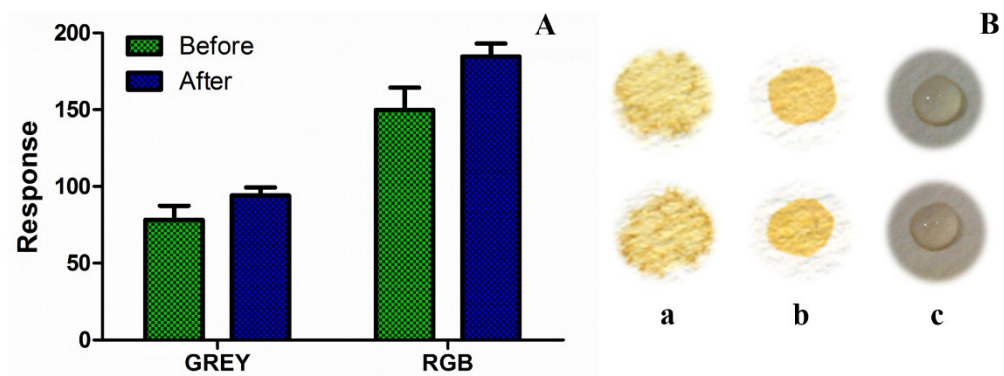

Fig. S2 Response of the cellulose paper before and after multilayer modification (A) and real images after addition of aqueous gallic acid samples (B). a, without multilayer modification; b, with multilayer modification; c, liquid drops formed at the multilayer surface.

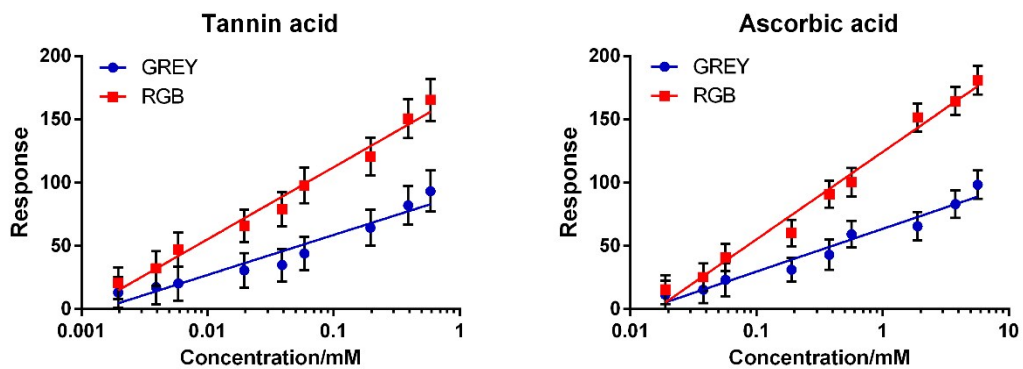

Fig. S3 Linear fitting of colorimetric response of the sensor toward different concentrations of tannic acid (left) and ascorbic acid (right)

)
